# Supplementary material
Source: publisher figshare collection journal article supplement (https://acs.figshare.com/ndownloader/files/3857254)
Supplement: Supplementary file 1 [file 3857254]

**Supporting Information to:**

**Efficient Production of Isoflavonoids by *Astragalus membranaceus* Hairy Root Cultures and Evaluation of Antioxidant Activities of Extracts**

Jiao Jiao,<sup>†,‡</sup> Qing-Yan Gai,<sup>‡,§,||</sup> Yu-Jie Fu,<sup>\*,§,||</sup> Wei Ma,<sup>\*,†,⊥</sup> Xiao Peng,<sup>§,||</sup> Sheng-Nan, Tan,<sup>§,||</sup> and Thomas Efferth<sup>#</sup>

<sup>†</sup>State Key Laboratory of Tree Genetics and Breeding and <sup>§</sup>Key Laboratory of Forest Plant Ecology, Ministry of Education, Northeast Forestry University, Harbin, Heilongjiang 150040, People's Republic of China

<sup>||</sup>Collaborative Innovation Center for Development and Utilization of Forest Resources, Harbin, Heilongjiang 150040, People's Republic of China

<sup>⊥</sup>School of Pharmaceutical, Heilongjiang University of Chinese Medicine, Harbin, Heilongjiang 150040, People's Republic of China

<sup>#</sup>Department of Pharmaceutical Biology, Institute of Pharmacy and Biochemistry, University of Mainz, Staudinger Weg 5, 55128 Mainz, Germany

**Corresponding authors:**

\*(Y.-J.F.) Tel/fax: +86-451-82190535. E-mail: yujie\_fu2011@ yahoo.com.

\*(W.M.) Tel/fax: +86-451-82193430. E-mail: mawei@hljucm.net.

**Author Contributions:**

<sup>‡</sup>J.J. and Q.-Y.G. contributed equally to this work.

**Table S1.** Specific primers used for PCR amplification.

| Genes       | Primers                                  | Products (bp) |
|-------------|------------------------------------------|---------------|
| <i>rolB</i> | 5-TAGCCGTGACTATAGCAAACCCCTCC-3 (forward) | 670           |
|             | 5-GGCTTCTTTCTTCAGGTTTACTGCAG-3 (reverse) |               |
| <i>rolC</i> | 5'-TAACATGGCTGAAGACGACC-3' (forward)     | 534           |
|             | 5'-AAACTTGCACTCGCCATGCC-3' (reverse)     |               |
| <i>aux1</i> | 5'-TTCGAAGGAAGCTTGTCAGAA-3' (forward)    | 350           |
|             | 5'-CTTAAATCCGTGTGACCATAG-3' (reverse)    |               |
| <i>virD</i> | 5'-ATGTCGCAAGGCAGTAAGCCC A-3' (forward)  | 438           |
|             | 5'-GGAGTCTTTCAGCAGGAGCAA-3' (reverse)    |               |

**Table S2.** MS parameters for five main IF constituents in AMHRCs <sup>a</sup>.

| Analytes | DP (V) | CE (V) | CXP (V) | SRM (amu)     |
|----------|--------|--------|---------|---------------|
| CAG      | -20    | -10    | -5      | 445.2 → 283.0 |
| ON       | -31    | -10    | -5      | 428.8 → 266.9 |
| ASG      | -58    | -23    | -5      | 463.2 → 301.1 |
| CA       | -70    | -24    | -5      | 283.0 → 268.0 |
| FO       | -55    | -31    | -5      | 267.0 → 252.0 |

<sup>a</sup> DP, CE, CXP and SRM are abbreviations of declustering potential, collision energy, cell exit potential and selected reaction monitoring, respectively.
